# Supplementary material for: Functionalization of Photosensitized Silica Nanoparticles for Advanced Photodynamic Therapy of Cancer
Source: MDPI journal article supplement (doi:10.3390/ijms22126618), 2021-06-21
Supplement: s1 [file s1]

ESI for:

**Functionalization of photosensitized silica nanoparticles for advanced photodynamic therapy for cancer**

Ruth Prieto-Montero<sup>1§</sup>, Alejandro Prieto-Castañeda<sup>2§</sup>, Alberto Katsumiti<sup>3,4§</sup>, Miren P. Cajaraville<sup>3</sup>, Antonia R. Agarrabeitia<sup>2</sup>, María J. Ortiz<sup>2\*</sup>, Virginia Martínez-Martínez<sup>1\*</sup>.

- <sup>1</sup> Departamento de Química Física, Universidad del País Vasco/Euskal Herriko Unibertsitatea (UPV/EHU), 48080 Bilbao, Spain
- <sup>2</sup> Departamento de Química Orgánica, Facultad de CC. Químicas, Universidad Complutense de Madrid, 28040 Madrid, Spain
- <sup>3</sup> CBET Research Group, Dept. Zoology and Animal Cell Biology; Faculty of Science and Technology and Research Centre for Experimental Marine Biology and Biotechnology PiE, University of the Basque Country UPV/EHU, 48620, Basque Country, Spain.
- <sup>4</sup> GAIKER Technology Centre, Basque Research and Technology Alliance (BRTA), 48170 Zamudio, Spain.

|                                              |     |
|----------------------------------------------|-----|
| 1. SEM, XPS and FTIR                         | S2  |
| 2. Absorption spectra and Photophysical data | S3  |
| 3. MMT assays                                | S4  |
| 4. EC50 values                               | S5  |
| 5. Fluorescence image                        | S6  |
| 6. Synthesis of new BODIPY-based PSs         | S7  |
| 7. Synthesis of MSNs                         | S8  |
| 8. Functionalization of FA                   | S9  |
| 9. Cell illumination                         | S10 |
| 10. RMN spectra                              | S11 |
| 11. References                               | S16 |

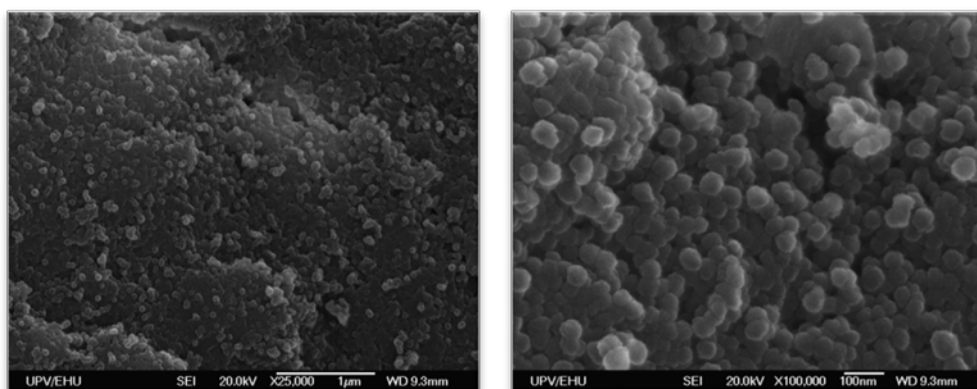

**Figure S1:** SEM image of MSNs.

**Table S1.** XPS data of mesoporous silica nanoparticles in water.

| Name     | Shell               | XPS (% At rel) |      |      |     |
|----------|---------------------|----------------|------|------|-----|
|          |                     | C              | O    | Si   | N   |
| NH-MSN   | NH <sub>2</sub> /OH | 23.6           | 46.0 | 25.4 | 5.0 |
| CN-MSN   | CN/OH               | 38.8           | 36.6 | 19.2 | 5.2 |
| COOH-MSN | COOH/OH             | 25.5           | 50.4 | 24.1 | -   |

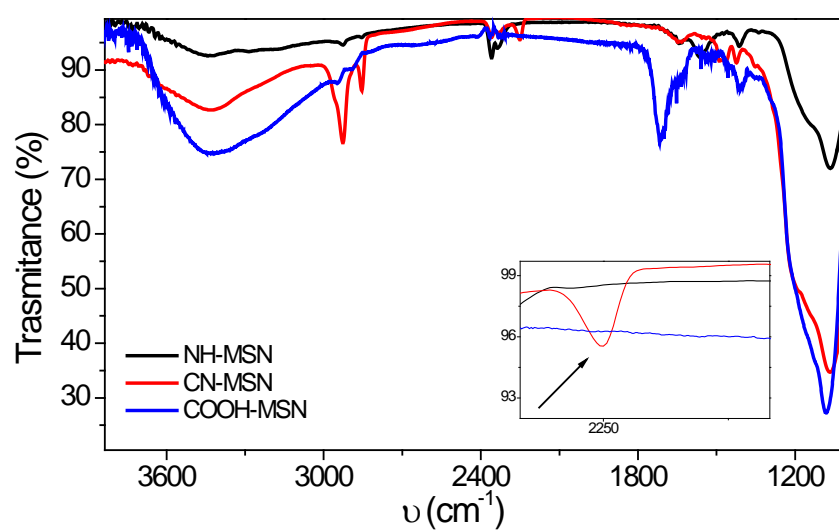

**Figure S2.** Infrared spectra of NH-MSN (black), CN-MSN (red) and COOH-MSN (blue) and from 2500 cm<sup>-1</sup> to 2150 cm<sup>-1</sup> (inset).

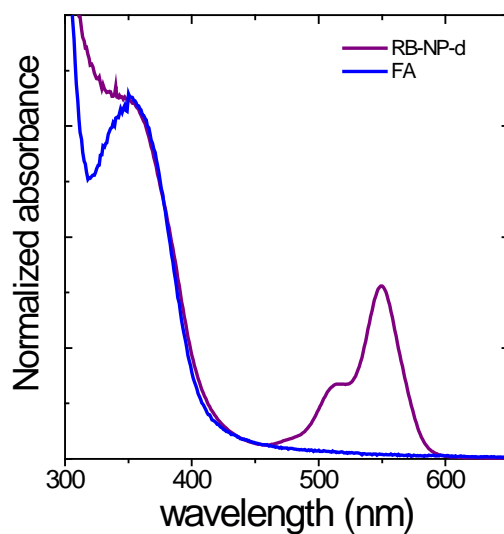

**Figure S3.** Normalized absorption spectra of folic acid (blue) and RB-PEG-NP-d (purple) in aqueous solution (0.5 mg/mL).

**Table S2.** Photophysical parameters and singlet oxygen quantum yields for graftable-PSs; absorption maxima ( $\lambda_{ab}$ ), molar absorption coefficient ( $\epsilon_{max}$ ), fluorescence maxima ( $\lambda_{fl}$ ), fluorescence quantum yield ( $\Phi_{fl}$ ), fluorescence lifetime ( $\tau_{fl}$ ), singlet oxygen quantum yield ( $\Phi_{\Delta}$ ) and Phototoxic Power ( $PP = \epsilon \times \Phi_{\Delta}$ ).

|      | $\lambda_{ab}$<br>(nm) | $\epsilon_{max}$<br>$10^{-4}$<br>( $M^{-1} cm^{-1}$ ) | $\lambda_{fl}$<br>(nm) | $\Phi_{fl}$ | $\tau_{fl}$<br>(ns)     | $\Phi_{\Delta}$ | PP<br>$10^{-4}$<br>( $M^{-1} cm^{-1}$ ) |
|------|------------------------|-------------------------------------------------------|------------------------|-------------|-------------------------|-----------------|-----------------------------------------|
| BDP1 | 447.0                  | 4.3                                                   | 513.5                  | 0.01        | 0.21                    | 0.79            | 3.40                                    |
| BDP2 | 535.0                  | 5.3                                                   | 549.0                  | 0.03        | 0.28                    | 0.95            | 5.04                                    |
| BDP3 | 534.0                  | 7.1                                                   | 547.0                  | 0.03        | 0.28                    | 0.93            | 6.60                                    |
| BDP4 | 511.0                  | 10.3                                                  | 526.0                  | 0.02        | 0.03 (94%)<br>3.57 (6%) | 0.77            | 7.96                                    |
| BDP5 | 511.0                  | 15.2                                                  | 532.0                  | 0.02        | 0.02 (97%)<br>3.88 (3%) | 0.84            | 12.79                                   |
| RB*  | 556.0                  | 9.8                                                   | 578.0                  | 0.10        | 0.56                    | 0.86            | 8.43                                    |
| BDP6 | 675.0                  | 5.2                                                   | 709.0                  | 0.20        | 2.04                    | 0.44            | 2.29                                    |
| BDP7 | 675.0                  | 7.9                                                   | 715.0                  | 0.21        | 2.05                    | 0.46            | 3.63                                    |
| Th*  | 600.0                  | 3.3                                                   | 621.0                  | 0.06        | 0.50                    | 0.79            | 2.61                                    |
| C6*  | 401.0                  | 9.0                                                   |                        |             |                         |                 | 7.20                                    |
|      | 501.0                  | 0.7                                                   | 669.5                  | 0.18        | 4.89                    | 0.80            | 0.56                                    |
|      | 661.0                  | 2.7                                                   |                        |             |                         |                 | 2.16                                    |

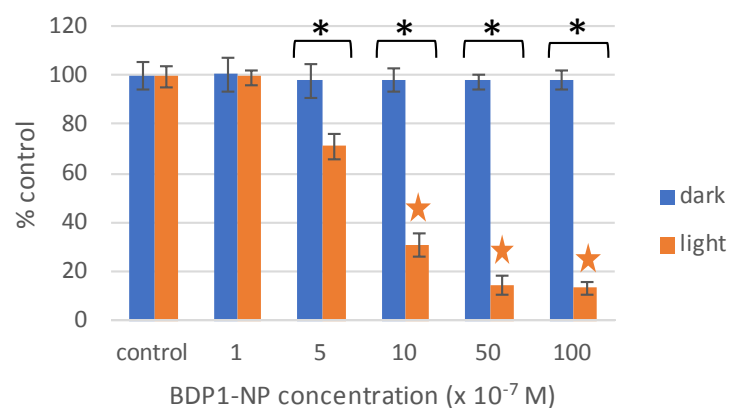

**Figure S4.** Cell viability (MTT assay) of HeLa cells exposed to the nanosystem BDP1-NP, in dark conditions (blue) and after blue irradiation at 10 J/cm<sup>2</sup> (red). Stars indicate significant differences with respect to controls. Asterisks indicate significant differences between dark and light conditions at the same concentration.

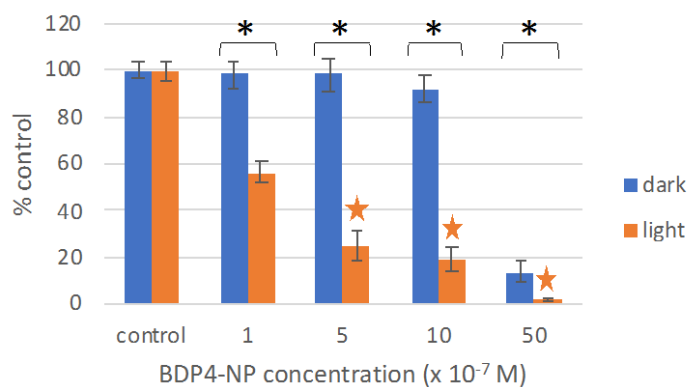

**Figure S5.** Cell viability (MTT assay) of HeLa cells exposed to the nanosystem BDP4-NP, in dark conditions (blue) and after green irradiation at 10 J/cm<sup>2</sup> (red). Stars indicate significant differences with respect to controls. Asterisks indicate significant differences between dark and light conditions at the same concentration.

**Table S3.** EC<sub>50</sub> in HeLa cells treated with PSs with carboxylic group for 24 h given as PS concentration.

|                  | Dark (x 10 <sup>-7</sup> M) | Light (x 10 <sup>-7</sup> M) |
|------------------|-----------------------------|------------------------------|
| RB               | -                           | 10.40                        |
| BDP2             | 39.2                        | < 1                          |
| BDP4             | -                           | 41.90                        |
| BDP6             | 39.8                        | < 1                          |
| C6               | 81.0                        | 6.85                         |
| -: not cytotoxic |                             |                              |

**Table S4.** EC<sub>50</sub> in HeLa cells treated with PS-NPs for 24 h given as PS concentration.

|                  | Dark (x 10 <sup>-7</sup> M) | Light (x 10 <sup>-7</sup> M) |
|------------------|-----------------------------|------------------------------|
| RB-PEG-NP-d      | -                           | 5.45                         |
| BDP1-NP          | -                           | 10.07                        |
| BDP3-NP          | -                           | 4.06                         |
| BDP4-NP          | 33.46                       | 4.43                         |
| BDP5-NP          | -                           | 1.12                         |
| BDP6-NP          | -                           | < 1                          |
| C6-NP            | -                           | 53.40                        |
| -: not cytotoxic |                             |                              |

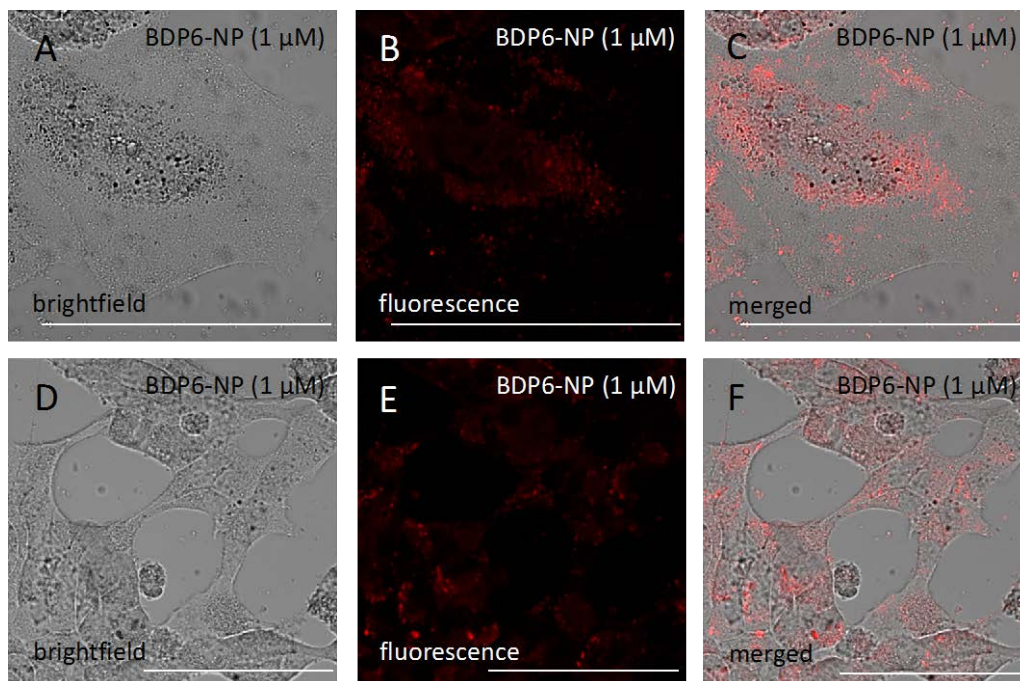

**Figure S6.** Fluorescence microscopy images ( $\lambda_{\text{ex}} = 640$  nm and  $\lambda_{\text{em}} = 645\text{-}700$  nm) of HeLa cells treated with 1  $\mu$ M BDP6-NP for 24 h. Scale bars = 100  $\mu$ m.

## Synthesis of new BODIPY-based PSs

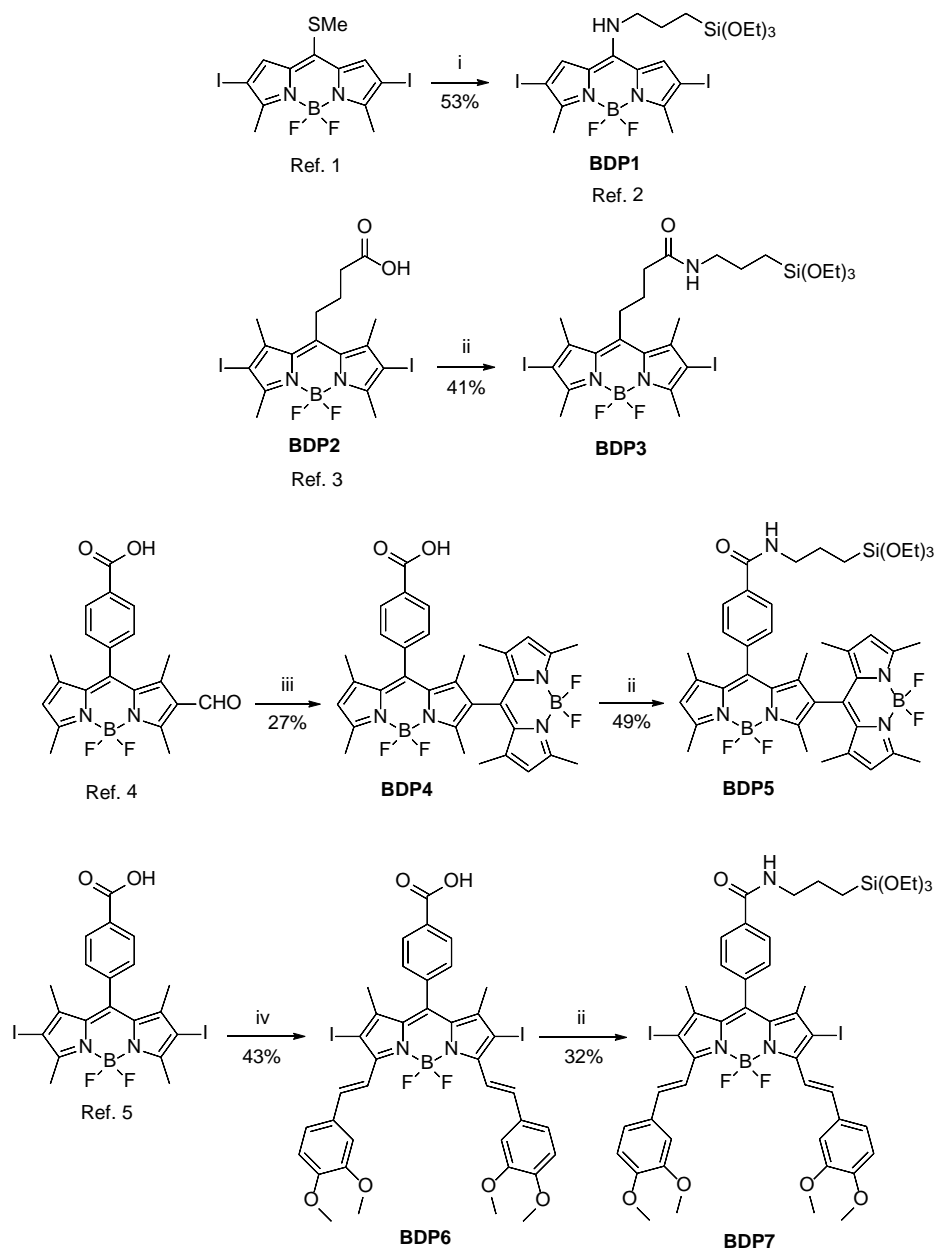

**Scheme S1.** Synthesis of BODIPYs **BDP1-BDP7**. Reaction conditions: i)  $\text{NH}_2\text{-(CH}_2\text{)}_3\text{-Si(OEt)}_3$ ,  $\text{CH}_3\text{CN/CH}_2\text{Cl}_2$  (1:1), rt; ii) APTES, TEA, EDC, HOBT,  $\text{CH}_2\text{Cl}_2$ , rt; iii) 2,4-dimethylpyrrole, TFA, DDQ, TEA,  $\text{BF}_3$ ,  $\text{Et}_2\text{O}$ ,  $\text{CH}_2\text{Cl}_2$ , rt; iv) 3,4-dimethoxybenzaldehyde, piperidine, AcOH, DMF, 80  $^\circ\text{C}$ , MW [1–5].

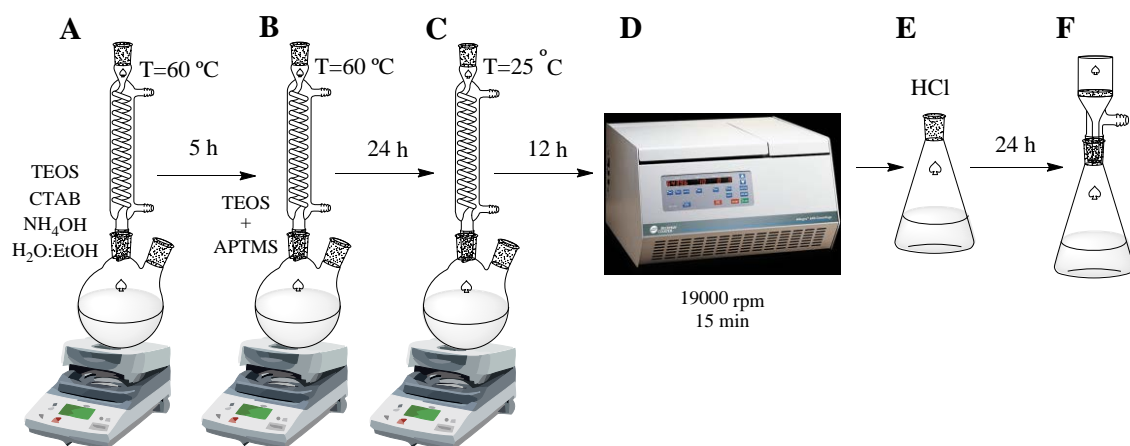

**Figure S7.** Synthesis of NH-MSN.

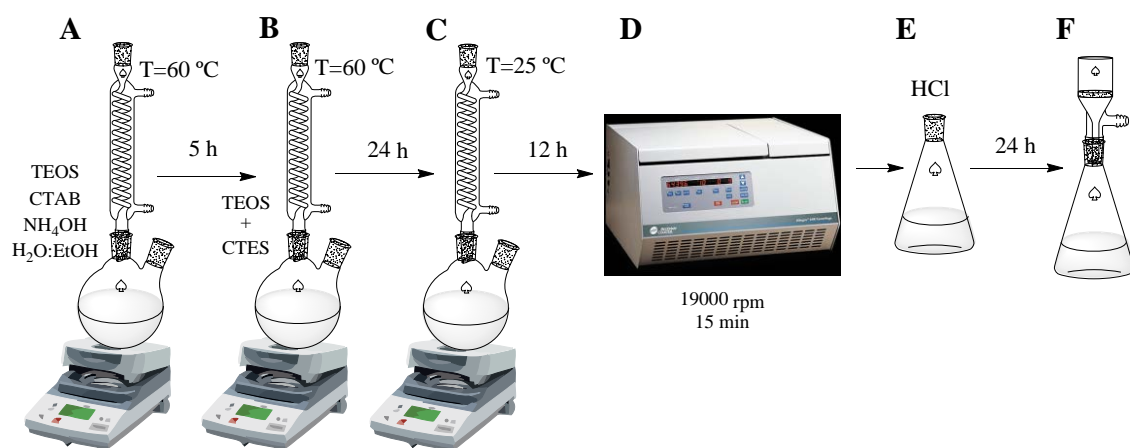

**Figure S8.** Synthesis of CN-MSN.

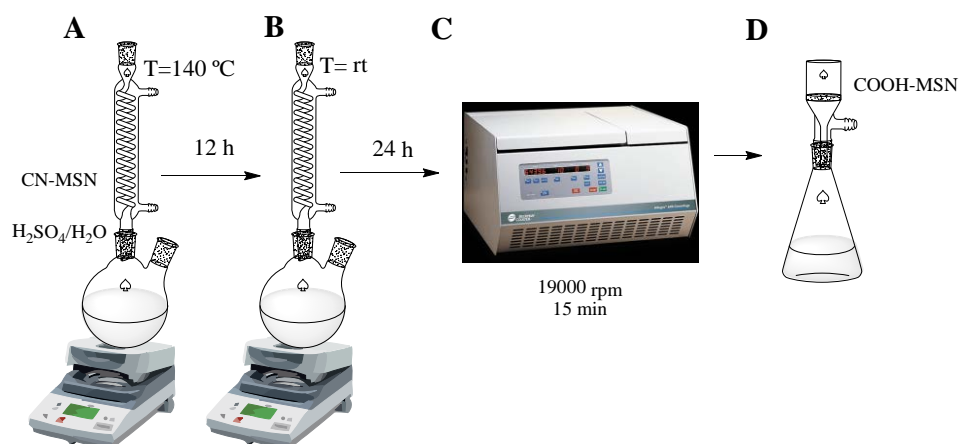

**Figure S9.** Synthesis of COOH-MSN from CN-MSN.



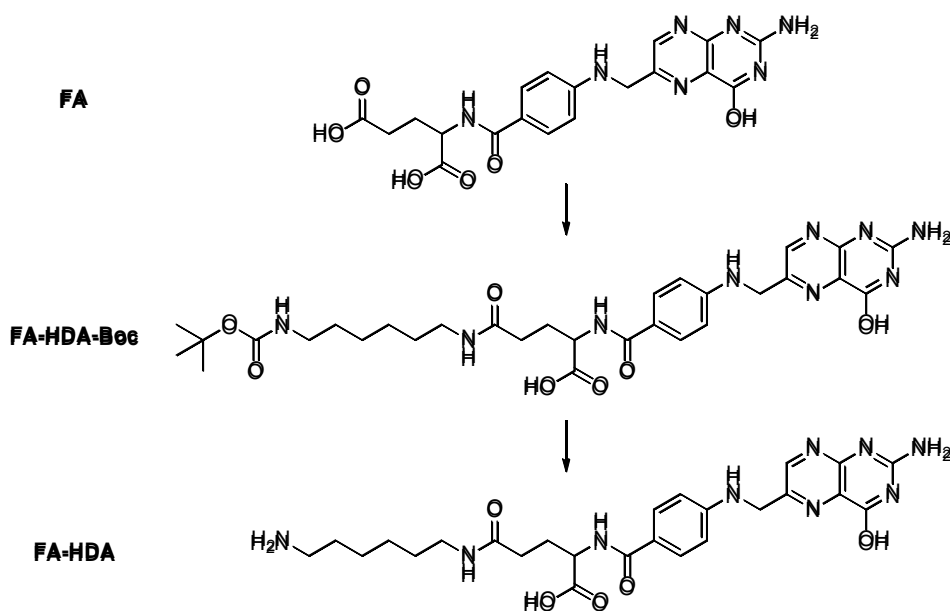

**Scheme S2.** Folic acid (FA) structure and their derivate FA-HDA-Boc and FA-HDA. **Procedure:** the edged carboxyl group was modified with *N*-Boc-1,6-hexanediamine (Boc-HDA) and the amine groups (FA-HDA) is obtained after removing Boc group, according to the reference.[6]

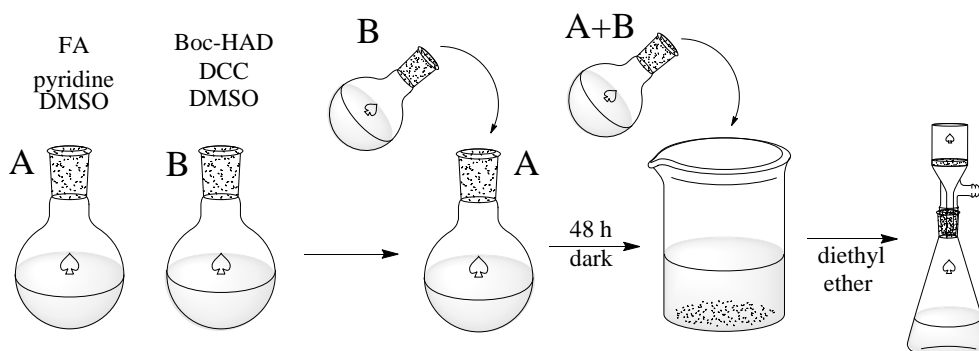

**Figure S10.** Synthesis of folic acid derivate FA-HDA-Boc.

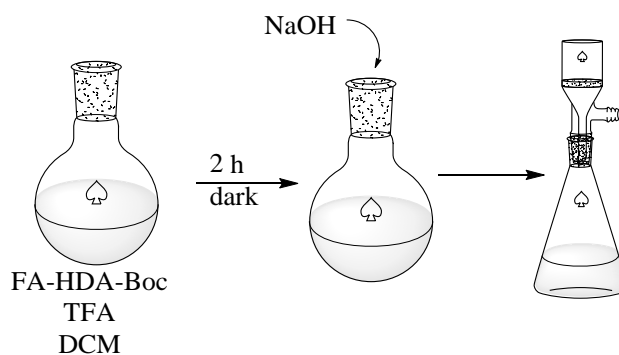

**Figure S11.** Deprotection of FA-HDA-Boc to obtain FA-HDA.

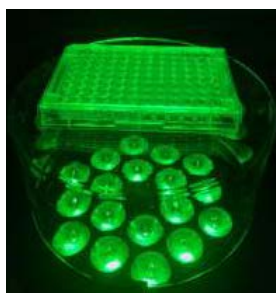

**Figure S12.** An example of the light irradiation to the HeLa cells by the green light ( $\lambda_{\text{ab}}$  518 nm) devices: LED Par 64 Short Q4-18 (Showtec, Burgebrach, Holland).

# <sup>1</sup>H NMR and <sup>13</sup>C NMR spectra

<sup>1</sup>H NMR (300 MHz, CDCl<sub>3</sub>) and <sup>13</sup>C NMR (75 MHz, CDCl<sub>3</sub>) spectra of **BDP3**

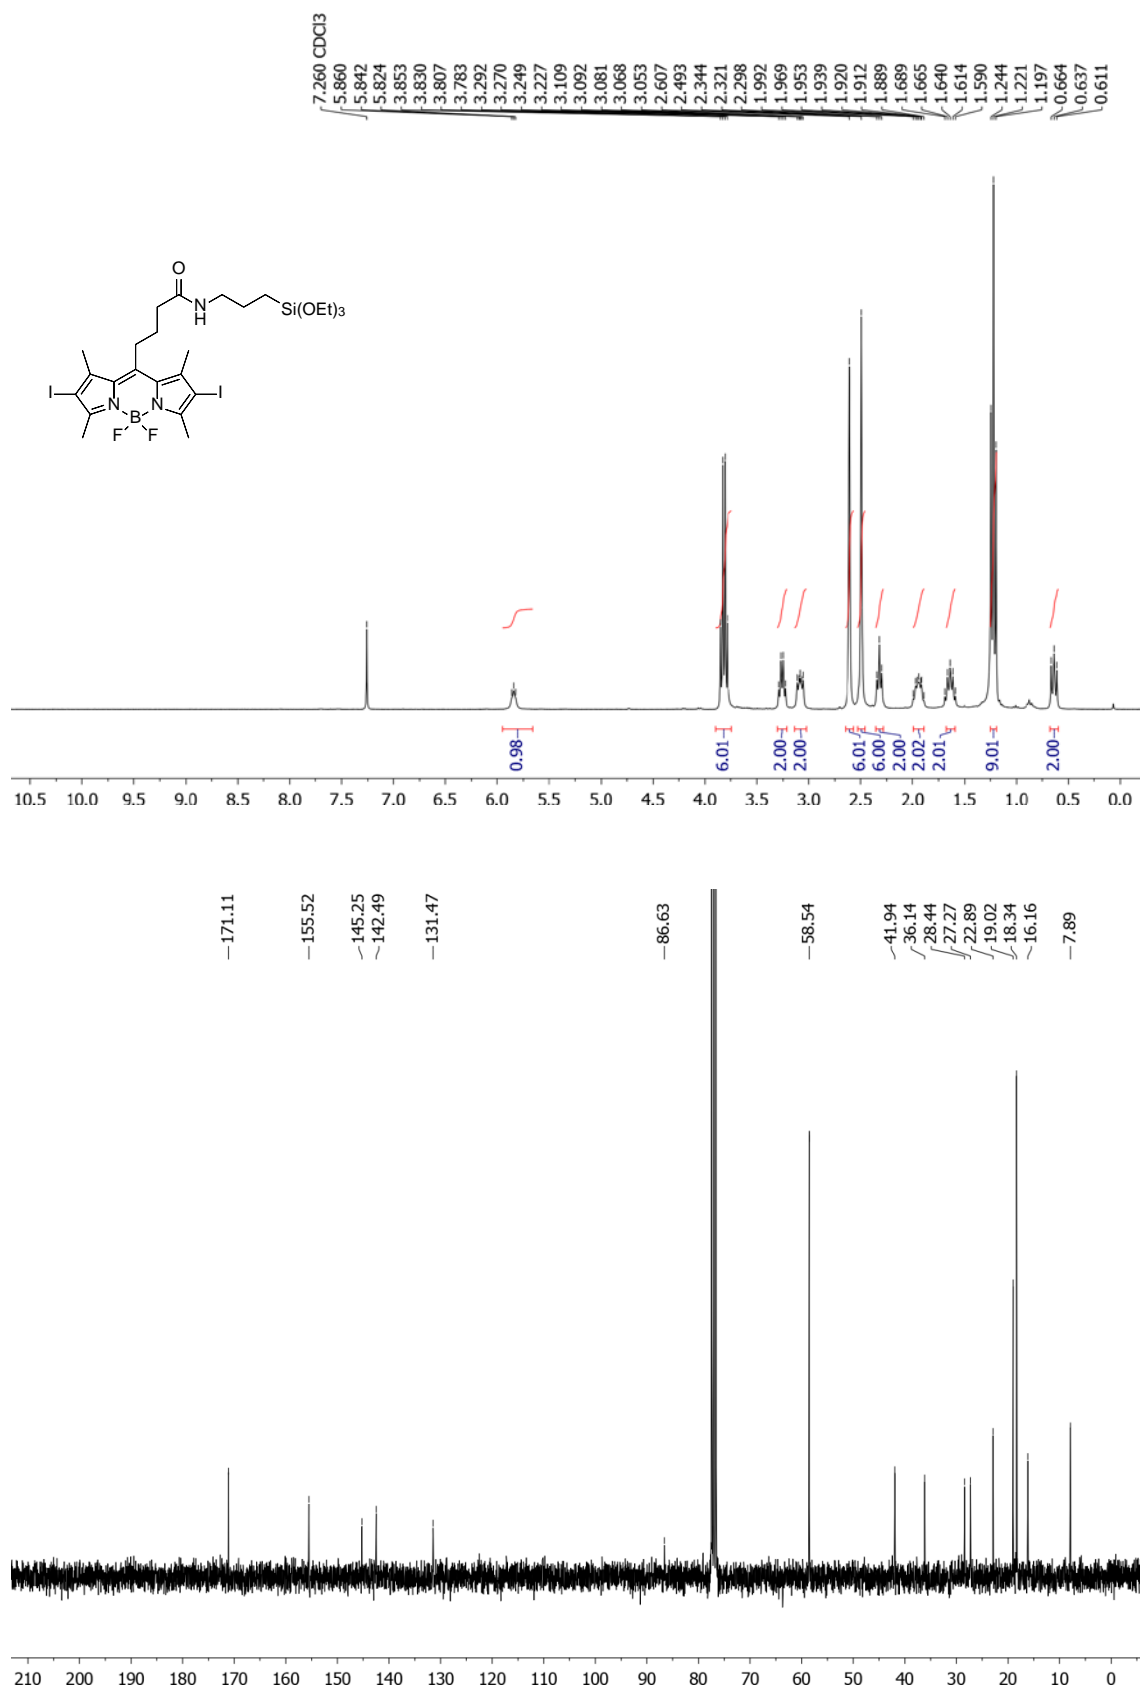

$^1\text{H}$  NMR (300 MHz,  $\text{CDCl}_3$ ) and  $^{13}\text{C}$  NMR (75 MHz,  $\text{CDCl}_3$ ) spectra of **BDP4**

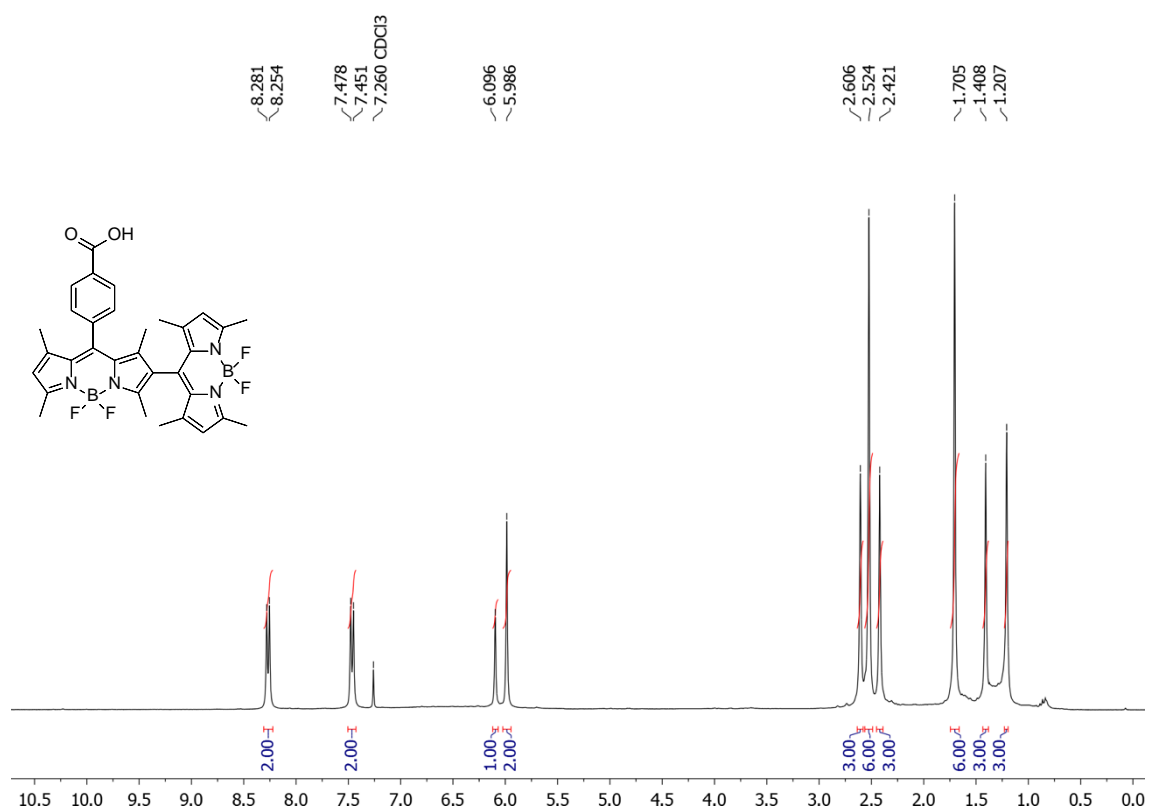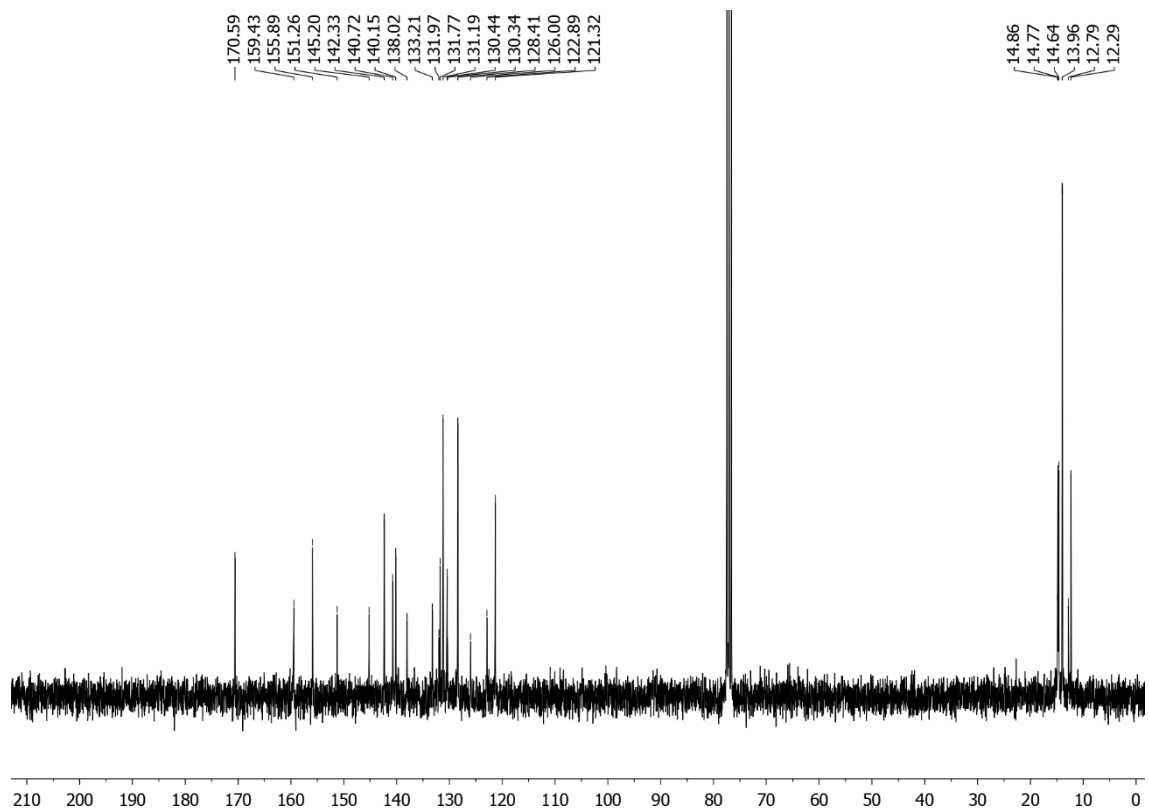

$^1\text{H}$  NMR (300 MHz,  $\text{CDCl}_3$ ) and  $^{13}\text{C}$  NMR (75 MHz,  $\text{CDCl}_3$ ) spectra of **BDP5**

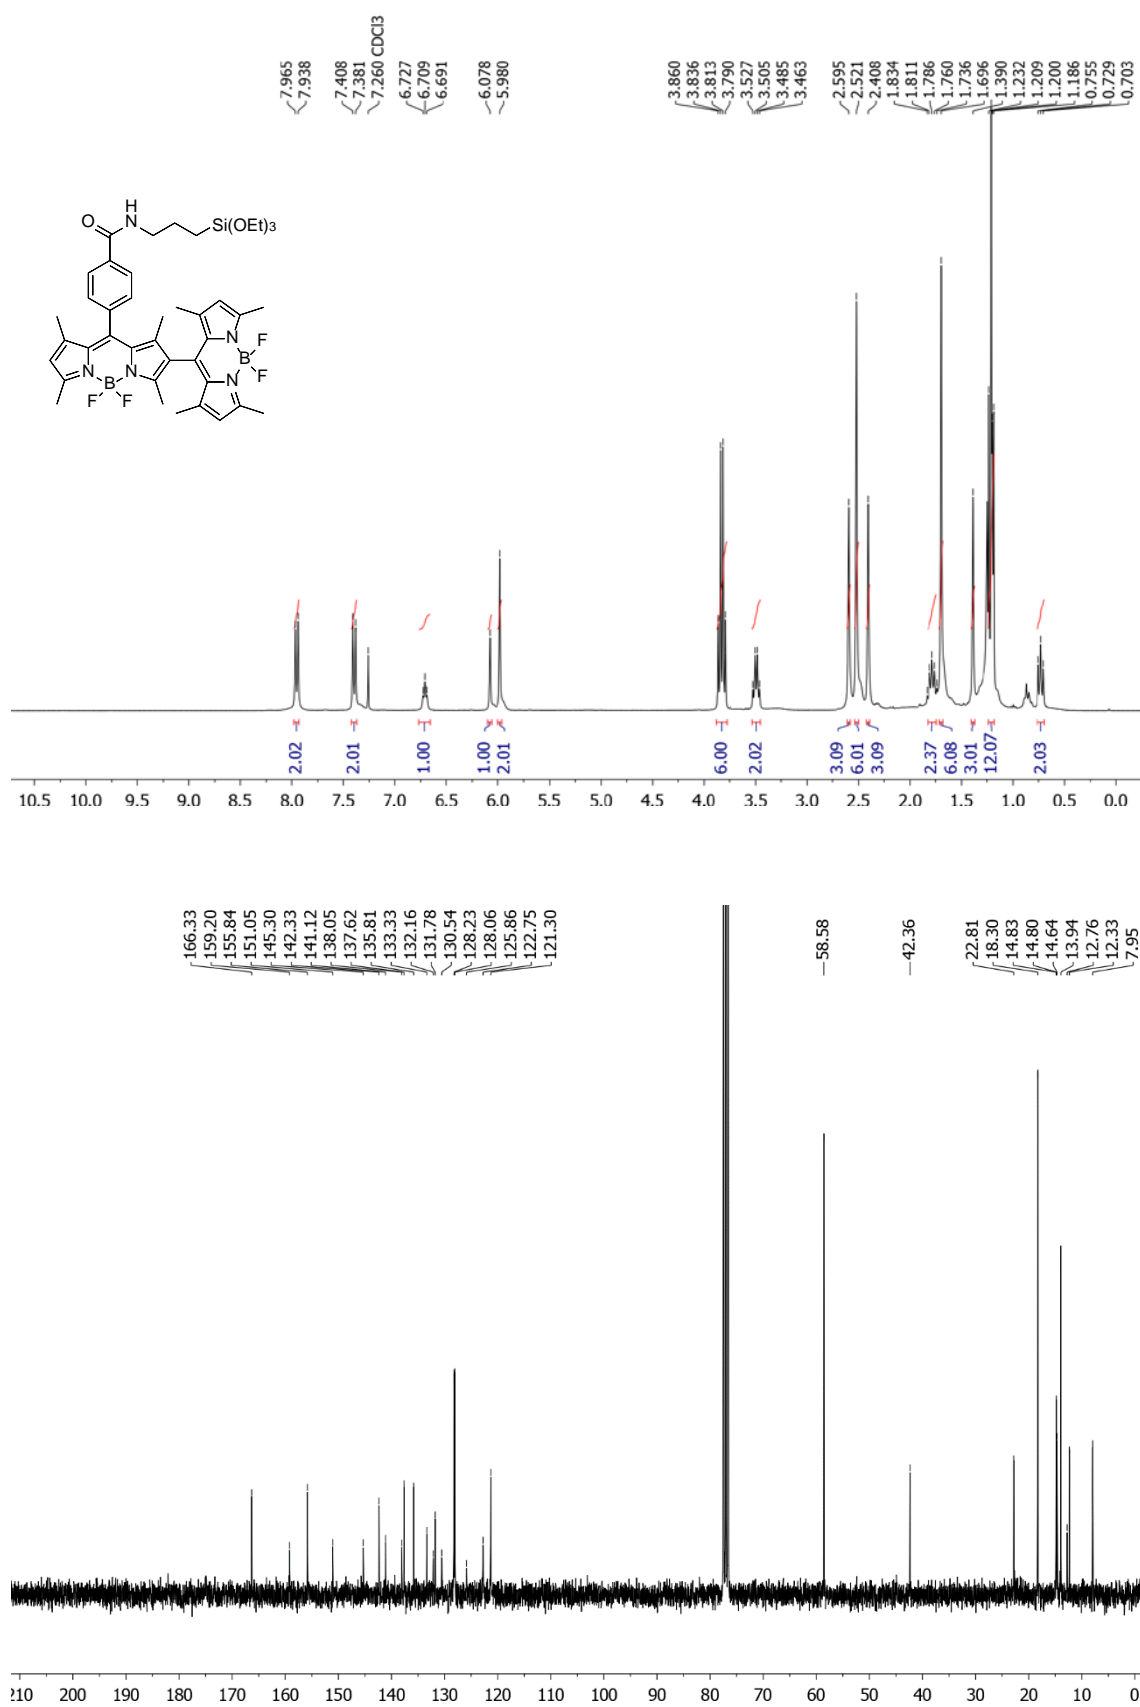

$^1\text{H}$  NMR (700 MHz,  $\text{CDCl}_3/\text{CD}_3\text{OD}$  4:1) and  $^{13}\text{C}$  NMR (176 MHz,  $\text{CDCl}_3/\text{CD}_3\text{OD}$  4:1) spectra of BDP6

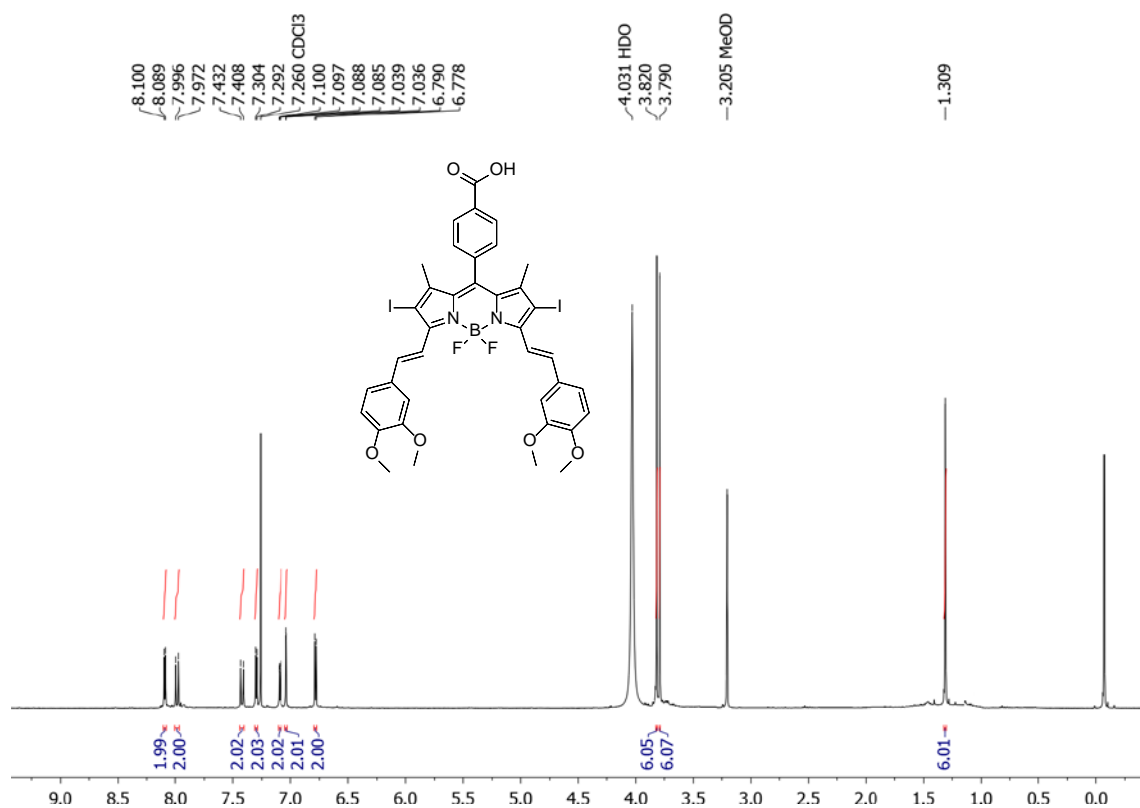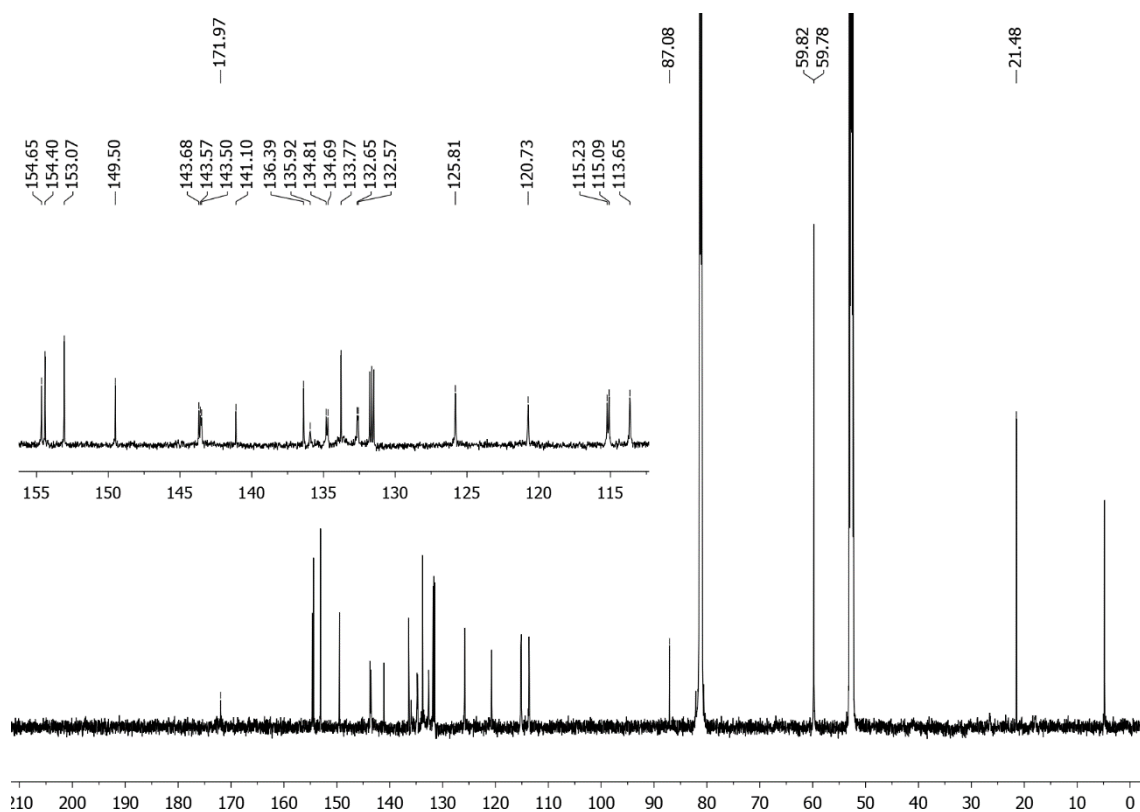

$^1\text{H}$  NMR (700 MHz,  $\text{CDCl}_3$ ) and  $^{13}\text{C}$  NMR (176 MHz,  $\text{CDCl}_3$ ) spectra of **BDP7**

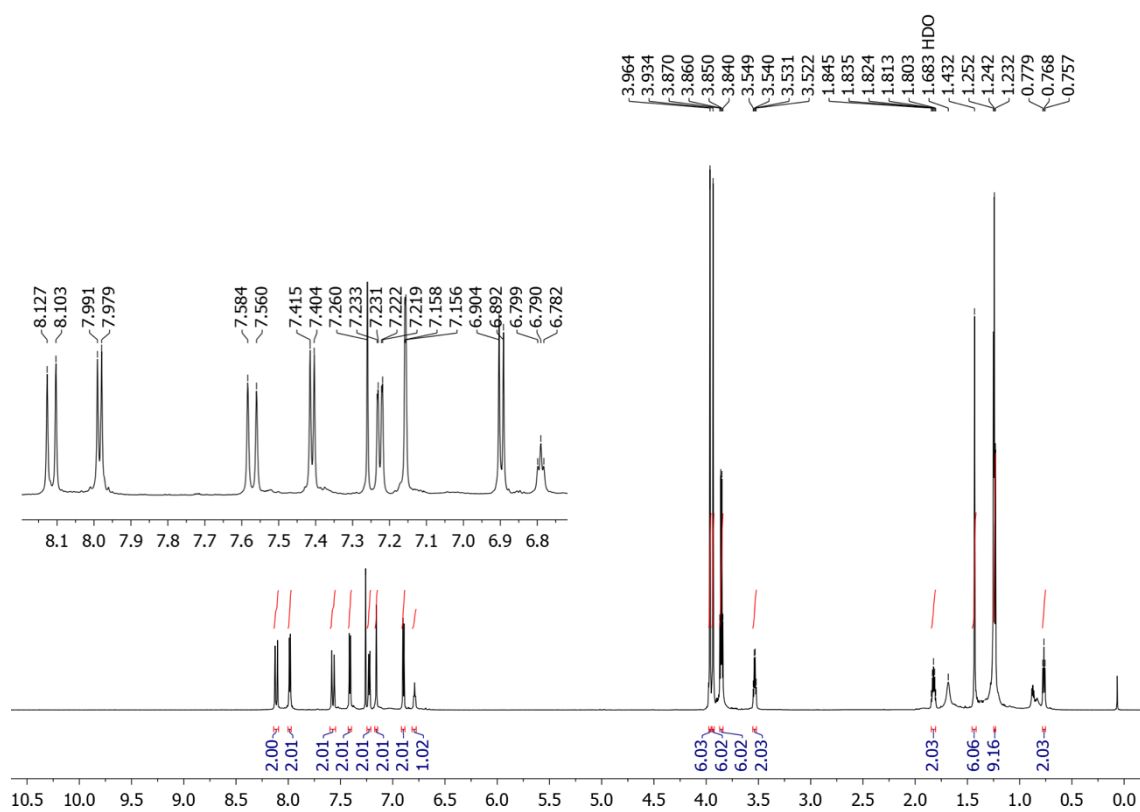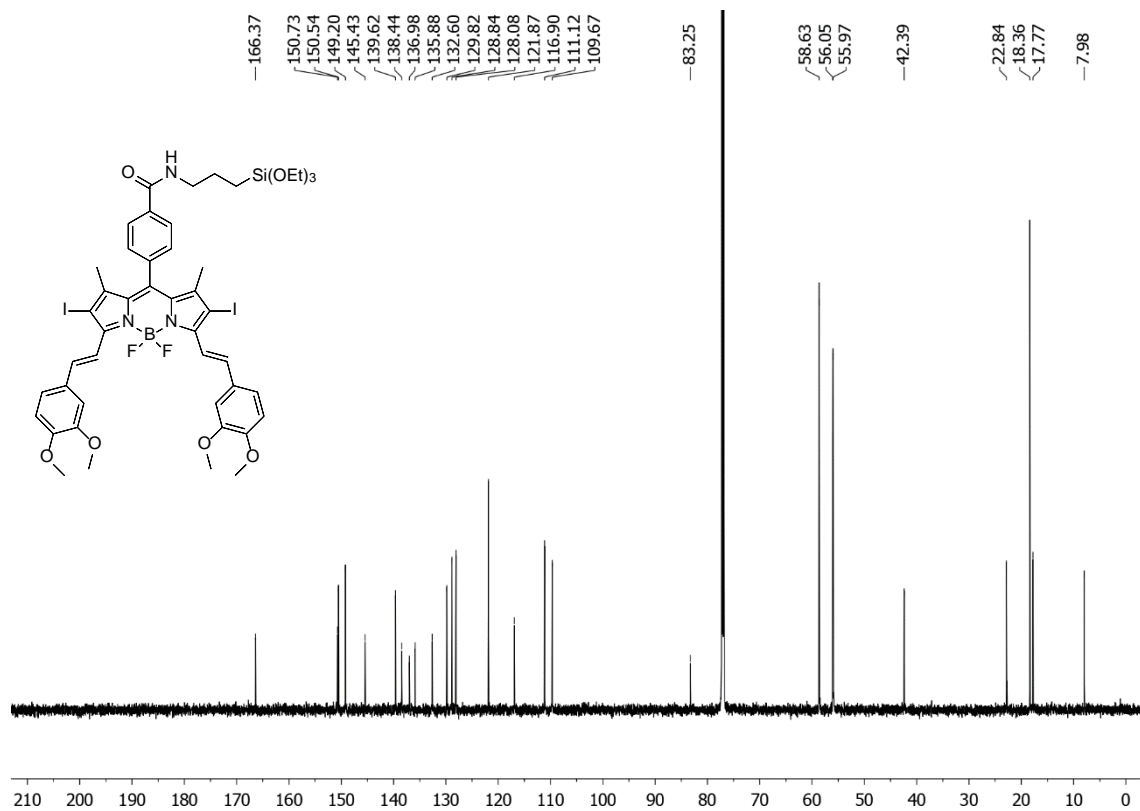

## References

1. Gómez-Durán, C.F.A.; Esnal, I.; Valois-Escamilla, I.; Urías-Benavides, A.; Bañuelos, J.; López Arbeloa, I.; García-Moreno, I.; Peña-Cabrera, E. Near-IR BODIPY Dyes à la Carte - Programmed Orthogonal Functionalization of Rationally Designed Building Blocks. *Chemistry - A European Journal* **2016**, *22*, 1048–1061.
2. Epelde-Elezcano, N.; Prieto-Montero, R.; Martínez-Martínez, V.; Ortiz, M.J.; Prieto-Castañeda, A.; Peña-Cabrera, E.; Belmonte-Vázquez, J.L.; López-Arbeloa, I.; Brown, R.; Lacombe, S. Adapting BODIPYs to singlet oxygen production on silica nanoparticles. *Physical Chemistry Chemical Physics* **2017**, *19*, 13746–13755.
3. Fraix, A.; Blangetti, M.; Guglielmo, S.; Lazzarato, L.; Marino, N.; Cardile, V.; Graziano, A.C.E.; Manet, I.; Fruttero, R.; Gasco, A.; et al. Light-tunable generation of singlet oxygen and nitric oxide with a bichromophoric molecular hybrid: A bimodal approach to killing cancer cells. *ChemMedChem* **2016**, *11*, 1371–1379.
4. Wu, G.; Zeng, F.; Wu, S. A water-soluble and specific BODIPY-based fluorescent probe for hypochlorite detection and cell imaging. *Analytical Methods* **2013**, *5*, 5589–5596.
5. Guo, S.; Zhang, H.; Huang, L.; Guo, Z.; Xiong, G.; Zhao, J. Porous material-immobilized iodo-Bodipy as an efficient photocatalyst for photoredox catalytic organic reaction to prepare pyrrolo[2,1-a]isoquinoline. *Chemical Communications* **2013**, *49*, 8689–8691.
6. Santiago, A.M.; Ribeiro, T.; Rodrigues, A.S.; Ribeiro, B.; Frade, R.F.M.; Baleizão, C.; Farinha, J.P.S. Multifunctional Hybrid Silica Nanoparticles with a Fluorescent Core and Active Targeting Shell for Fluorescence Imaging Biodiagnostic Applications. *European Journal of Inorganic Chemistry* **2015**, *2015*, 4579–4587.
